# Supplementary material for: Using estimated probability of pre-diagnosis behavior as a predictor of cancer survival time: an example in esophageal cancer
Source: BMC Med Res Methodol. 2020 Apr 3;20:74. doi: 10.1186/s12874-020-00957-5 (PMC7118984; doi:10.1186/s12874-020-00957-5)
Supplement: Supplementary file 1 — Additional file 1:Table S1. Disease Characteristics and Outcomes of Eligible SEER Cancer Registry Esophagael Cancer Cases and BRFSS Health Survey Respondents 2001–2015. [file 12874_2020_957_MOESM1_ESM.xlsx]

## Sheet: Sheet1
Table S1. Disease Characteristics and Outcomes of Eligible SEER Cancer Registry Esophagael Cancer Cases and BRFSS Health Survey Respondents 2001-2015.
	Eligible esophageal cancer cases 2001-2015 (n=56,824)			Eligible BRFSS respondents 2001-2015 (n=1,450,775)
	n	%		n	%
Number who died
died	46242	0.814
censored	10582	0.186
Cancer type
Squamous cell carcinoma (ESCC)	19130	0.337
Adenocarcinoma (EAC)	30067	0.529
other	7627	0.134
Cancer stage
I	7215	0.156
II	7756	0.167
III	8390	0.081
IV	14852	0.32
Unknown	8164	0.176
Not collected	10447
Current smoker
yes				233533	0.161
no				1195828	0.824
missing				21414	0.015
Alcohol - binge drinking
yes				152087	0.105
no				1246293	0.859
missing				52395	0.036
Alcohol - heavy drinking
yes				68968	0.048
no				1325544	0.914
missing				56263	0.039
Current smoking and alcohol consumption
yes
no				39431	0.027
missing				1348373	0.929
				62971	0.043
Obese
yes				370146	0.255
no				1004366	0.692
missing				76263	0.053
Undertook exercise in past 30 days other than regular job
yes				1071481	0.739
no				353711	0.243
missing				25583	0.018
State of residence
Alaskaa	93	0.002		41515	0.029
California	20478	0.36		135572	0.093
Connecticut	3222	0.057		99883	0.069
Georgia	6299	0.111		89692	0.062
Hawaii	825	0.015		82915	0.057
Iowa	2893	0.051		83015	0.057
Kentucky	3571	0.063		121288	0.084
Louisiana	3412	0.06		92248	0.064
Michigan	3412	0.06		114870	0.079
New Jersey	6950	0.122		159302	0.11
New Mexico	1251	0.022		90128	0.062
Utah	1004	0.018		109605	0.076
Washington	3414	0.06		230742	0.159
Year of diagnosis or survey
2001	3519	0.062		54078	0.037
2002	3410	0.06		58489	0.04
2003	3518	0.062		76551	0.053
2004	3791	0.067		77720	0.054
2005	3476	0.061		92681	0.064
2006	3675	0.065		95708	0.066
2007	3737	0.066		94696	0.065
2008	3810	0.067		101275	0.07
2009	3936	0.069		116729	0.08
2010	3879	0.068		111233	0.077
2011	3942	0.069		127934	0.088
2012	3979	0.07		120058	0.083
2013	3951	0.07		112713)	0.078
2014	4063	0.072		106771	0.074
2015	4138	0.073		104139	0.072
Age
25-29 years	excluded	excluded		75187	0.052
30-34 years	excluded	excluded		95776	0.066
35-39 years	341	0.006		110567	0.076
40-44 years	910	0.016		123417	0.085
45-49 years	2311	0.041		137293	0.095
50-54 years	4310	0.076		156343	0.108
55-59 years	6608	0.116		158319	0.109
60-64 years	8171	0.144		151202	0.104
65-69 years	8622	0.152		132403	0.091
70-74 years	7896	0.139		107064	0.074
75-79 years	7288	0.128		84215	0.058
80-84 years	5664	0.1		105,523*	0.073
85+ years	4703	0.083
Missing				13466	0.009
Sex
male	43856	0.772		568196	0.392
female	12968	0.228		882579	0.608
Marital status
married/defacto	30553	0.538		860291	0.593
divorced/separated	6761	0.119		240596	0.166
widowed	7816	0.038		185631	0.128
single/never married	8769	0.154		156718	0.108
missing	2925	0.051		7539	0.005
Race
white	47447	0.835		1217366	0.839
black	6422	0.113		108396	0.075
Pacific or Asian	2475	0.044		79878	0.055
American Indian/Alaskan Native	340	0.006		26893	0.019
Missing	140	0.002		18242	0.013
excluded				44670
a For Alaska, the SEER cancer registry records American Indians and Alaskan natives only
