# Supplementary material for: Using estimated probability of pre-diagnosis behavior as a predictor of cancer survival time: an example in esophageal cancer
Source: BMC Med Res Methodol. 2020 Apr 3;20:74. doi: 10.1186/s12874-020-00957-5 (PMC7118984; doi:10.1186/s12874-020-00957-5)
Supplement: Supplementary file 2 — Additional file 2:Table S2. Associations Between the Selected Demographic Variables and Health Behaviors in the BRFSS Health Survey Data Set. [file 12874_2020_957_MOESM2_ESM.xlsx]

## Sheet: Sheet1
Table S2. Associations Between the Selected Demographic Variables and Health Behaviours in the BRFSS Health Survey Data Set.
	Current smoking				Alcohol - binge drinking				Alcohol - heavy drinking				Current smoking and alcohol consumption				Undertook exercise in past 30 days other than regular job				Obese
	OR	95% CI	AUC		OR	95% CI	AUC		OR	95% CI	AUC		OR	95% CI	AUC		OR	95% CI	AUC		OR	95% CI	AUC
State of residence
Alaska a	1.93	1.93,1.93			1.36	1.36,1.36			1.14	1.14,1.14			1.73	1.72,1.74			0.96	0.96,0.96			1.21	1.21,1.21
California	1				1				1				1				1				1
Connecticut	1.25	1.25,1.25			1.06	1.06,1.06			0.93	0.93,0.93			1.17	1.16,1.17			0.96	0.95,0.96			0.92	0.92,0.92
Georgia	1.63	1.63,1.63			0.85	0.85,0.85			0.74	0.74,0.74			1.2	1.20,1.20			0.76	0.76,0.76			1.27	1.27,1.27
Hawaii	1.23	1.23,1.24			1.18	1.18,1.18			1.15	1.15,1.15			1.38	1.37,1.38			1.06	1.07,1.06			0.85	0.85,0.85
Iowa	1.56	1.56,1.56			1.35	1.35,1.35			0.89	0.89,0.90			1.39	1.39,1.39			0.81	0.80,0.81			1.27	1.27,1.27
Kentucky	2.5	2.49,2.50			0.71	0.70,0.71			0.6	0.60,0.61			1.14	1.14,1.14			0.58	0.58,0.58			1.38	1.38,1.38
Louisiana	2.04	2.04,2.04			1.01	1.01,1.01			0.85	0.85,0.85			1.49	1.49,1.49			0.56	0.56,0.56			1.5	1.49,1.50
Michigan	1.83	1.83,1.83			1.22	1.22,1.22			0.94	0.94,0.94			1.47	1.47,1.47			0.83	0.83,0.83			1.37	1.36,1.37
New Jersey	1.32	1.32,1.32			0.96	0.96,0.97			0.74	0.74,0.74			1.04	1.04,1.04			0.77	0.77,0.77			0.99	0.99,0.99
New Mexico	1.6	1.59,1.60			0.84	0.84,0.84			0.8	0.80,0.80			1.26	1.26,1.26			0.92	0.92,0.92			1.03	1.03,1.03
Utah	0.79	0.79,0.79			0.65	0.65,0.65			0.52	0.52,0.52			0.8	0.79,0.80			1.17	1.17,1.17			1.02	1.02,1.03
Washington	1.35	1.35,1.35	0.574		1.05	1.05,1.05	0.558		0.97	0.97.0.97	0.567		1.28	1.27,1.28	0.542		1.2	1.20,1.20	0.573		1.09	1.09,1.09	0.547
Year of survey
per additional year	0.98	0.98,0.98	0.544		1.03	1.03,1.03	0.516		1.02	1.02,1.02	0.523		0.99	0.99,0.99	0.525		1	1.00,1.00	0.499		1.03	1.03,1.03	0.529
Age
per additional 5 year age category	0.9	0.90,0.90	0.608		0.82	0.82,0.82	0.68		0.95	0.95,0.95	0.546		0.87	0.87,0.87	0.616		0.93	0.93,0.93	0.573		0.99	0.99,0.99	0.516
Sex
male	1				1				1				1				1				1
female	0.74	0.74,0.74	0.519		0.37	0.37,0.37	0.62		0.81	0.81,0.81	0.529		0.33	0.33,0.33	0.627		0.8	0.80,0.81	0.528		0.93	0.93,0.93	0.507
Marital status
married/defacto	1				1				1				1				1				1
separated/divorced	2.44	2.44,2.44			1.13	1.13,1.13			1.38	1.38,1.38			2.03	2.03,2.03			0.67	0.67,0.67			1.19	1.19,1.19
widowed	0.95	0.94,0.95			0.31	0.31,0.31			0.77	0.77,0.77			0.73	0.73,0.74			0.49	0.49,0.49			0.94	0.94,0.94
single	2.14	2.14,2.14	0.596		1.9	1.90,1.90	0.584		1.54	1.54,1.54	0.551		2.5	2.50,2.51	0.606		0.86	0.86,0.86	0.566		1.17	1.17,1.17	0.525
Race
white	1				1				1				1				1				1
black	1.29	1.29,1.29			0.75	0.75,0.75			0.62	0.62,0.62			0.98	0.98,0.99			0.64	0.64,0.64			1.75	1.75,1.76
Pacific or Asian	0.59	0.59,0.59			0.66	0.66,0.66			0.49	0.48,0.49			0.55	0.55,0.56			1.01	1.01,1.01			0.44	0.44,0.44
American Indian or Alaskan Native	1.69	1.68,1.69	0.522		1.25	1.25,1.25	0.512		1.04	1.04,1.04			1.48	1.48,1.48	0.51		0.72	0.72,0.72	0.522		1.6	1.60,1.60	0.54
All predictors combined			0.682				0.738				0.624				0.713				0.623				0.589
Abbreviations: AUC, area under the curve; CI, confidence interval; OR, odds ratio
a For Alaska, the SEER cancer registry records American Indians and Alaskan natives only
